RESEARCH ARTICLE

# Association between early preterm birth and maternal exposure to fine particulate matter (PM<sub>10</sub>): A nation-wide population-based cohort study using machine learning

Eun-Saem Choi<sup>1</sup> , Jue Seong Lee<sup>2</sup> , Yujin Hwang<sup>2,3</sup>, Kwang-Sig Lee<sup>3\*</sup> , Ki Hoon Ahn<sup>1\*</sup> 

**1** Department of Obstetrics and Gynecology, Korea University College of Medicine, Korea University Anam Hospital, Seoul, Korea, **2** Department of Pediatrics, Korea University College of Medicine, Korea University Anam Hospital, Seoul, Korea, **3** AI Center, Korea University College of Medicine, Korea University Anam Hospital, Seoul, Korea

 These authors contributed equally to this work.

\* [akh1220@hanmail.net](mailto:akh1220@hanmail.net) (KHA); [ecophy@hanmail.net](mailto:ecophy@hanmail.net) (KSL)

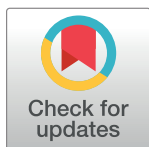

## OPEN ACCESS

**Citation:** Choi E-S, Lee JS, Hwang Y, Lee K-S, Ahn KH (2023) Association between early preterm birth and maternal exposure to fine particulate matter (PM<sub>10</sub>): A nation-wide population-based cohort study using machine learning. PLoS ONE 18(8): e0289486. <https://doi.org/10.1371/journal.pone.0289486>

**Editor:** Gang Qin, Affiliated Hospital of Nantong University, CHINA

**Received:** January 17, 2023

**Accepted:** July 19, 2023

**Published:** August 7, 2023

**Copyright:** © 2023 Choi et al. This is an open access article distributed under the terms of the [Creative Commons Attribution License](https://creativecommons.org/licenses/by/4.0/), which permits unrestricted use, distribution, and reproduction in any medium, provided the original author and source are credited.

**Data Availability Statement:** The data presented in this study are not publicly available. However, the data are available from the corresponding authors upon reasonable request and under the permission of Korea National Health Insurance Service (<https://nhiss.nhiss.or.kr/bd/ab/bdaba032eng.do>). Researchers may also reach out directly to the Korea National Health Insurance Service for data access. The findings of this study can be replicated based on the data obtained directly from Korea National Health Insurance Service and the protocol

## Abstract

Although preterm birth (PTB), a birth before 34 weeks of gestation accounts for only less than 3% of total births, it is a critical cause of various perinatal morbidity and mortality. Several studies have been conducted on the association between maternal exposure to PM and PTB, but the results were inconsistent. Moreover, no study has analyzed the risk of PM on PTB among women with cardiovascular diseases, even though those were thought to be highly susceptible to PM considering the cardiovascular effect of PM. Therefore, we aimed to evaluate the effect of PM<sub>10</sub> on early PTB according to the period of exposure, using machine learning with data from Korea National Health Insurance Service (KNHI) claims. Furthermore, we conducted subgroup analysis to compare the risk of PM on early PTB among pregnant women with cardiovascular diseases and those without. A total of 149,643 primiparous singleton women aged 25 to 40 years who delivered babies in 2017 were included. Random forest feature importance and SHAP (Shapley additive explanations) value were used to identify the effect of PM<sub>10</sub> on early PTB in comparison with other well-known contributing factors of PTB. AUC and accuracy of PTB prediction model using random forest were 0.9988 and 0.9984, respectively. Maternal exposure to PM<sub>10</sub> was one of the major predictors of early PTB. PM<sub>10</sub> concentration of 5 to 7 months before delivery, the first and early second trimester of pregnancy, ranked high in feature importance. SHAP value showed that higher PM<sub>10</sub> concentrations before 5 to 7 months before delivery were associated with an increased risk of early PTB. The probability of early PTB was increased by 7.73%, 10.58%, or 11.11% if a variable PM<sub>10</sub> concentration of 5, 6, or 7 months before delivery was included to the prediction model. Furthermore, women with cardiovascular diseases were more susceptible to PM<sub>10</sub> concentration in terms of risk for early PTB than those without cardiovascular diseases. Maternal exposure to PM<sub>10</sub> has a strong association with early PTB. In addition, in the context of PTB, pregnant women with cardiovascular diseases

described in method section. The authors had no special data access privilege. This is the policy of the Korea National Health Insurance Service.

**Funding:** This study was supported by a grant from the Korea University Medical Center (no. K1925051). The funder provided support for author [KHA]. In addition, this study was also supported by a grant from the Korea Health Technology R&D Project funded by the Korea Health Industry Development Institute, Ministry of Health & Welfare, Republic of Korea (No. HI22C1302), and the funder provided support for author [K-SL]. However, both funders had no role in study design, data collection and analysis, decision to publish, or preparation of the manuscript. The specific roles of these authors are articulated in the 'author contributions' section.

**Competing interests:** The authors have declared that no competing interests exist.

are a high-risk group of PM<sub>10</sub> and the first and early second trimester is a high-risk period of PM<sub>10</sub>.

## Introduction

Preterm birth (PTB), a delivery before 37<sup>0/7</sup> weeks of gestation, has been an unsolved major problem in obstetrics for a long time. PTB is divided into early and late PTB according to gestational age (GA). Early PTB is defined as a delivery occurring before 34<sup>0/7</sup> weeks of gestation and late PTB is defined as a delivery occurring between 34<sup>0/7</sup> and 36<sup>6/7</sup> weeks of gestation [1]. PTB accounts for up to 10% of total global births. Early PTB rate was about 2.8% in 2019 in United States and has not decreased over the past decades [2–5]. Although early PTB rate is relatively lower than late PTB rate, early PTB has more significant clinical impact. The mortality of infants born in early PTB period was more than 5 times higher than that of infants born in late PTB in the United States in 2018 [6]. Moreover, early PTB neonates are also at more risk of various morbidities than late PTB neonates [7]. Major complications of neonates including respiratory distress syndrome (RDS), intraventricular hemorrhage (IVH), and even long-term neurodevelopmental morbidities increase with decreasing GA [8–10]. For these reasons, prediction and management of early PTB have always been important issues.

Various factors associated with PTB ranging from genetic features to environmental factors have been reported [11–14]. Among various environmental factors affecting PTB, air pollution, especially exposure to fine particulate matter (PM), has drawn increasing attention in recent decades. Many studies about the association between PM and PTB was also conducted, but the results were conflicting [12–22]. Huynh et al. have reported that maternal exposure to PM can increase the risk of PTB while Pereira et al. could not find a significant association between the two [15, 16]. Several meta-analyses have been conducted to examine the association between PTB and PM, but their results were also inconsistent [23–26]. Ju L et al demonstrated that the exposure of PM<sub>10</sub> throughout pregnancy was associated with the increased risk of moderate PTB (delivery at 32–36 weeks of gestation) with a relative risk (RR) of 1.80 (95% confidence interval [CI]: 1.05–1.11) and very PTB (28–31 weeks of gestation) with a RR of 1.13 (95% CI: 1.06–1.21) [23]. However, Yu Z et al reported no significant association between PM<sub>10</sub> and moderate and very PTB [24]. Therefore, the association between PM<sub>10</sub> and PTB is not yet definitive.

PM<sub>10</sub> which is particles with an aerodynamic diameter equal or less than 10 µm is a well-known risk factor for cardiovascular diseases [27–30]. Several previous studies demonstrated that the cardiovascular diseases of pregnant women are associated with the increased risk of PTB [31–34]. Furthermore, the more severe cardiovascular diseases are, the greater the risk of PTB. Based on the association between PM<sub>10</sub> and cardiovascular diseases, it is postulated that pregnant women with cardiovascular diseases may be more susceptible to the effect of PM<sub>10</sub> on PTB. However, the effect of PM<sub>10</sub> on pregnant women with cardiovascular diseases is lacking.

Therefore, this study aimed to evaluate the effect of PM<sub>10</sub> on early PTB compared with effects of known PTB-contributing factors by establishing a prediction model of early PTB using machine learning. In this study, we used data extracted from Korea National Health Insurance (KNHI) claims and concentration of PM<sub>10</sub> estimated by the national system. In addition, we compared effects of PM<sub>10</sub> on PTB in pregnant women with cardiovascular diseases and those without cardiovascular diseases.

## Methods

### Study population

This nation-wide population-based cohort study included women aged 25 to 40 years. Singleton primiparous women who delivered babies in 2017 were included. Those who had late PTB were excluded. Data were extracted from KNHI claims. In South Korea, more than 97% of total population are enrolled in KNHI. The database of KNHI contains almost all data covered by the insurance under the National Health Insurance System. KNHI claims data were provided after de-identification according to the Act on the Protection of Personal Information [35]. This retrospective cohort study was approved by the Institutional Review Board (IRB) of Korea University Anam Hospital on November 5, 2018 (2018AN0365). Informed consent was waived by the IRB.

### Variables

The dependent variable was early PTB in 2017. All variables except for PM<sub>10</sub> were introduced according to the ICD-10 Code and procedure code (S1 Table). PM<sub>10</sub> concentration by region was provided by the National Ambient Air Monitoring System in South Korea. The National Ambient Air Monitoring System in South Korea consists of 505 stations covering all 162 cities, countries, and districts in the entire nation. By using the demographic information of the study population that was provided from the KNHIS database, we matched the monthly concentration of PM<sub>10</sub> to each participant. The missing data of PM<sub>10</sub> concentration were imputed using median substitution of the PM<sub>10</sub> concentration obtained from a nearby monitoring station. A total of 55 independent variables covered the following information: (1) PM<sub>10</sub> data in 2016 using regional PM<sub>10</sub> concentration matched with the residence address of study population, including PM<sub>10</sub> concentration data of specific month (from January 2016 to December 2016) and PM<sub>10</sub> concentration of each month before delivery (1 to 10 months before delivery); (2) demographic/socioeconomic determinants in 2017 including age and socioeconomic status measured by an insurance fee with the range of 0 (the lowest group) to 20 (the highest group); (3) obstetric and gynecologic diseases (namely, placenta previa, threatened abortion, incompetent internal os of cervix, gestational diabetes, hypertensive disorders during pregnancy (HDP) including gestational hypertension, preeclampsia and eclampsia, congenital malformation of uterus, pelvic inflammatory disease, vaginitis, endometriosis, abnormal menstruation, recurrent miscarriage or infertility) for any year between 2002 and 2016; (4) cardiovascular diseases (i.e., acyanotic congenital heart diseases (CHD), cyanotic CHD, arrhythmia, cardiomyopathy, congestive heart failure (CHF), ischemic heart disease (IHD), and cardiac arrest) for any year between 2002 and 2016; (5) other medical diseases, including hypertension, diabetes, hyperlipidemia, anemia, pulmonary embolism, sepsis, and stroke; and (6) medication history (that is, benzodiazepine, calcium channel blocker (CCB), nitrate, progesterone, hypnotic/sedative drug (antihistamine, zolpidem, eszopiclone, pentobarbital sodium, and benzodiazepine derivatives), and tricyclic antidepressant (TCA)) in 2002–2016. Women with cardiovascular diseases were defined as women who had a history of at least one of following cardiovascular diseases: acyanotic CHD, cyanotic CHD, arrhythmia, cardiomyopathy, congestive heart failure (CHF), ischemic heart disease (IHD), and cardiac arrest. These disease data and medication history were screened using ICD-10 and ATC codes, respectively (S2 Table).

### Analysis

Logistic regression, and the random forest were used for the prediction of early PTB [36–42]. A random forest is a group of decision trees with a majority vote on the dependent variable.

The random forest with 100 decision trees was employed in this study (100 training sets were sampled with replacements, 100 decision trees were trained with the 100 training sets, and 100 decision trees made 100 predictions). The random forest took a majority vote on the dependent variable. Data of 149,643 cases with full information were split into training and validation sets at a ratio of 80:20. Random forest feature importance was introduced for identifying major determinants of PTB and testing its associations with PM<sub>10</sub> concentrate, socioeconomic status, cardiovascular disease and medication history using benzodiazepine, progesterone, and tricyclic antidepressants. Subgroup analysis of pregnant women with underlying cardiovascular diseases was performed. Major determinants were defined as variables ranked as the top 50% among all variables in the early PTB prediction model. Oversampling approach was applied so that training of machine learning could be balanced between early PTB and term birth groups. Furthermore, to determine how specific variables worked in the prediction model, SHAP (Shapley Additive Explanations) value was computed. Python (CreateSpace: Scotts Valley, 2009) was employed for the analysis between December 15, 2021 and April 15, 2022.

## Results

### Characteristics of study population

A total of 149,643 primiparous women were included in the final analysis. Among the study population, 3,066 (2.05%) women had early PTB and 10,953 (7.32%) women had at least one underlying cardiovascular disease. Maternal age at delivery was higher in women with early PTB than in those with term birth (32.19 years vs. 31.84 years,  $p < 0.0001$ ). Most cardiovascular diseases except CHD were more common in women who had early PTB than those who had term birth. Baseline characteristics of the study population are described in [Table 1](#). [Table 2](#) shows monthly PM<sub>10</sub> concentration data (from January 2016 to December 2016) and PM<sub>10</sub> concentration of each month before delivery (from 1 to 10 months before delivery) in each group (term birth vs. early PTB). The concentration of PM<sub>10</sub> was significantly different between early PTB and term birth groups in summer and early fall (from June to September). During the period from 5 to 7 months before delivery, women who had early PTB were exposed to significantly higher concentrations of PM<sub>10</sub> than those who had term birth.

### Prediction model for early PTB and effect of PM<sub>10</sub> on PTB

[Table 3\(a\)](#) presents accuracy, sensitivity, specificity and areas under the operating-characteristic-curve (AUC) of the early PTB prediction model. With the random forest model for oversampled data, the AUC was 0.9988 and the accuracy was 0.9984. With the logistic-regression model, the AUC was 0.6787 and the accuracy was 0.5450. The performance of the random forest model was superior to the logistic regression model. The model with oversampled data showed greater AUC than that model with the original data. Therefore, we considered findings of logistic regression as supplementary findings.

Results of feature importance of major determinants of early PTB are presented in [Table 4](#). It should be noted that most of the major determinants of early PTB for oversampling data were similar to those for original data. Socioeconomic status influenced PTB the most, followed by age at delivery. Among 27 major determinants of early PTB, PM<sub>10</sub> concentration of each specific month before delivery ranked within top-10 major determinants of early PTB in oversampled data. PM<sub>10</sub> concentration of each period before delivery (i.e., PM<sub>10</sub> concentrations of five months before delivery) had more impact on early PTB than PM<sub>10</sub> concentration of a specific month (i.e., PM<sub>10</sub> concentration of December). This trend was also shown in the original data. This finding implies that maternal exposure to PM<sub>10</sub> is associated with early PTB

Table 1. Baseline characteristics of study population.

| Variables                            | Term birth<br>(n = 146,577) | Early preterm birth<br>(n = 3,066) | P        |
|--------------------------------------|-----------------------------|------------------------------------|----------|
| Demographic information              |                             |                                    |          |
| Age at delivery (years)              | 31.84                       | 32.19                              | < 0.0001 |
| Socioeconomic status (Insurance fee) | 11.15                       | 11.08                              | 0.4797   |
| Cardiovascular diseases              |                             |                                    |          |
| Cyanotic CHD                         | 31 (0.02%)                  | 2 (0.07%)                          | 0.1037   |
| Acyanotic CHD                        | 247 (0.17%)                 | 6 (0.20%)                          | 0.7169   |
| Arrhythmia                           | 6,327 (4.32%)               | 155 (5.06%)                        | 0.0467   |
| Cardiomyopathy                       | 73 (0.05%)                  | 6 (0.20%)                          | 0.0005   |
| Congestive heart failure             | 676 (0.46%)                 | 26 (0.85%)                         | 0.0019   |
| Ischemic heart disease               | 4,078 (2.78%)               | 110 (3.59%)                        | 0.0074   |
| Cardiac arrest                       | 7 (0.01%)                   | 0 (0%)                             | 0.7020   |
| Obstetric and gynecologic diseases   |                             |                                    |          |
| Placenta previa                      | 489 (0.33%)                 | 9 (0.29%)                          | 0.7030   |
| Threatened abortion                  | 18,291 (12.48%)             | 498 (16.24%)                       | < 0.0001 |
| Incompetent internal os of cervix    | 90 (0.06%)                  | 4 (0.13%)                          | 0.1309   |
| Gestational diabetes                 | 65,103 (44.42%)             | 1,444 (47.10%)                     | 0.0031   |
| Hypertension during pregnancy        | 6,164 (4.21%)               | 291 (9.49%)                        | < 0.0001 |
| Congenital malformation of uterus    | 401 (0.27%)                 | 26 (0.85%)                         | < 0.0001 |
| Pelvic inflammatory disease          | 42,429 (28.95%)             | 1,085 (35.39%)                     | < 0.0001 |
| Vaginitis                            | 117,299 (80.03%)            | 2,515 (82.03%)                     | 0.0060   |
| Endometriosis                        | 5,972 (4.07%)               | 213 (6.95%)                        | < 0.0001 |
| Abnormal menstruation                | 42,370 (28.91%)             | 996 (32.49%)                       | < 0.0001 |
| Recurrent abortion or infertility    | 31,572 (21.54%)             | 933 (30.43%)                       | < 0.0001 |
| Other medical diseases               |                             |                                    |          |
| Hypertension                         | 17,724 (12.09%)             | 487 (15.88%)                       | < 0.0001 |
| Diabetes                             | 5,303 (3.62%)               | 193 (6.29%)                        | < 0.0001 |
| Hyperlipidemia                       | 33,098 (22.58%)             | 884 (28.83%)                       | < 0.0001 |
| Anemia                               | 41,169 (28.09%)             | 983 (32.06%)                       | < 0.0001 |
| Pulmonary embolism                   | 64 (0.04%)                  | 1 (0.03%)                          | 0.7714   |
| Sepsis                               | 84,252 (57.48%)             | 1,873 (61.09%)                     | < 0.0001 |
| Stroke                               | 605 (0.41%)                 | 16 (0.52%)                         | 0.3524   |
| Medication                           |                             |                                    |          |
| Benzodiazepine                       | 61,740 (42.12%)             | 1,480 (48.27%)                     | < 0.0001 |
| Calcium channel blocker              | 422 (0.29%)                 | 17 (0.55%)                         | 0.0069   |
| Nitrate                              | 310 (0.21%)                 | 5 (0.16%)                          | 0.5627   |
| Progesterone                         | 23,817 (16.25%)             | 620 (20.22%)                       | < 0.0001 |
| Hypnotic/sedative drug               | 7,067 (4.82%)               | 231 (7.53%)                        | < 0.0001 |
| Tricyclic antidepressant             | 15,027 (10.25%)             | 388 (12.65%)                       | < 0.0001 |

<https://doi.org/10.1371/journal.pone.0289486.t001>

and that the impact of  $PM_{10}$  is greater than well-known contributing factors of early PTB, such as infection (feature importance in oversampled data,  $PM_{10}$  concentration in six months before delivery (0.0320) vs. pelvic inflammatory disease (0.0198) vs. vaginitis (0.0197)) (Table 4(a)). Fig 1 presents SHAP value of the prediction model which shows the sign and magnitude for the effect of a major determinant on early PTB. SHAP value of  $PM_{10}$  concentration of 5 to 7 months before delivery (first and early second trimester of pregnancy) ranked high. Higher  $PM_{10}$  concentration increased the risk of early PTB. The probability of early PTB

Table 2. PM<sub>10</sub> concentration exposed to study population.

| PM <sub>10</sub> concentration                                                    | Term birth (n = 146,577) | Early preterm birth (n = 3,066) | P        |
|-----------------------------------------------------------------------------------|--------------------------|---------------------------------|----------|
| Monthly PM <sub>10</sub> concentration (μm/m <sup>3</sup> )                       |                          |                                 |          |
| PM <sub>10</sub> in Jan un2016                                                    | 50.25                    | 50.38                           | 0.3898   |
| PM <sub>10</sub> in Feb 2016                                                      | 47.42                    | 47.41                           | 0.9011   |
| PM <sub>10</sub> in Mar 2016                                                      | 61.70                    | 61.87                           | 0.3637   |
| PM <sub>10</sub> in Apr 2016                                                      | 68.18                    | 68.35                           | 0.3269   |
| PM <sub>10</sub> in May 2016                                                      | 54.78                    | 54.83                           | 0.6631   |
| PM <sub>10</sub> in Jun 2016                                                      | 43.22                    | 43.48                           | 0.0240   |
| PM <sub>10</sub> in Jul 2016                                                      | 30.93                    | 31.20                           | 0.0024   |
| PM <sub>10</sub> in Aug 2016                                                      | 34.17                    | 34.41                           | 0.0326   |
| PM <sub>10</sub> in Sep 2016                                                      | 37.50                    | 37.78                           | 0.0071   |
| PM <sub>10</sub> in Oct 2016                                                      | 39.40                    | 39.58                           | 0.1176   |
| PM <sub>10</sub> in Nov 2016                                                      | 53.64                    | 53.83                           | 0.2232   |
| PM <sub>10</sub> in Dec 2016                                                      | 48.36                    | 48.49                           | 0.3667   |
| PM <sub>10</sub> concentration of each month before delivery (μm/m <sup>3</sup> ) |                          |                                 |          |
| PM <sub>10</sub> in 10 months before delivery                                     | 47.56                    | 45.95                           | < 0.0001 |
| PM <sub>10</sub> in 9 months before delivery                                      | 47.33                    | 47.04                           | 0.1907   |
| PM <sub>10</sub> in 8 months before delivery                                      | 46.37                    | 47.89                           | < 0.0001 |
| PM <sub>10</sub> in 7 months before delivery                                      | 47.02                    | 49.90                           | < 0.0001 |
| PM <sub>10</sub> in 6 months before delivery                                      | 47.11                    | 50.05                           | < 0.0001 |
| PM <sub>10</sub> in 5 months before delivery                                      | 47.57                    | 49.37                           | < 0.0001 |
| PM <sub>10</sub> in 4 months before delivery                                      | 47.06                    | 47.79                           | 0.0042   |
| PM <sub>10</sub> in 3 months before delivery                                      | 46.74                    | 46.24                           | 0.0459   |
| PM <sub>10</sub> in 2 months before delivery                                      | 46.11                    | 44.40                           | < 0.0001 |
| PM <sub>10</sub> in 1 month before delivery                                       | 45.30                    | 43.27                           | < 0.0001 |

<https://doi.org/10.1371/journal.pone.0289486.t002>

was increased by 7.73%, 10.58% or 11.11% if a variable PM<sub>10</sub> concentration of 5, 6, or 7 months before delivery was included to the prediction model.

### Effect of PM<sub>10</sub> on PTB in women with underlying cardiovascular diseases

Subgroup analysis of women with underlying cardiovascular diseases was conducted. Table 3 (b) presents accuracy, sensitivity, specificity and AUC of the subgroup analysis. Early PTB prediction model by random forest of oversampled data in both women with and without cardiovascular diseases also showed a fine performance. Table 4(b) presents feature importance of major determinants of early PTB in subgroup analysis. A total of 22 variables of PM<sub>10</sub> concentration ranked in 3<sup>rd</sup> to 24<sup>th</sup> of feature importance in women with cardiovascular diseases. However, 17 variables of PM<sub>10</sub> concentration were ranked as major determinants in women without cardiovascular diseases. The rank of PM<sub>10</sub> concentration was relatively lower in women without cardiovascular diseases than in those with cardiovascular diseases. This implies that women with cardiovascular diseases might be more susceptible to PM<sub>10</sub> concentration in terms of risk for early PTB than those without cardiovascular diseases. This trend was also observed in original data in a stronger way.

## Discussion

### Main finding

This large population-based cohort study set the prediction model for early PTB using random forest. The AUC and accuracy of PTB prediction model using random forest were 0.9988 and



**Table 3. Performance measures of prediction model.** (a) Prediction model for early PTB in total study population, (b-1) Prediction model for early PTB in women with underlying cardiovascular diseases, (b-2) Prediction model for early PTB in women without underlying cardiovascular diseases.

|                            |                    | Original data | Oversampled data |
|----------------------------|--------------------|---------------|------------------|
| <b>(a)</b>                 |                    |               |                  |
| <b>Logistic Regression</b> | <b>Accuracy</b>    | 0.9805        | 0.6787           |
|                            | <b>Sensitivity</b> | 0.0000        | 0.5508           |
|                            | <b>Specificity</b> | 0.9805        | 0.6914           |
|                            | <b>AUC</b>         | 0.5000        | 0.5450           |
| <b>Random Forest</b>       | <b>Accuracy</b>    | 0.9803        | 0.9984           |
|                            | <b>Sensitivity</b> | 0.0000        | 0.9951           |
|                            | <b>Specificity</b> | 0.9805        | 1.0000           |
|                            | <b>AUC</b>         | 0.4999        | 0.9988           |
| <b>(b-1)</b>               |                    |               |                  |
| <b>Logistic Regression</b> | <b>Accuracy</b>    | 0.9759        | 0.6683           |
|                            | <b>Sensitivity</b> | 0.0000        | 0.5109           |
|                            | <b>Specificity</b> | 0.9759        | 0.6924           |
|                            | <b>AUC</b>         | 0.5000        | 0.5527           |
| <b>Random Forest</b>       | <b>Accuracy</b>    | 0.9749        | 0.9981           |
|                            | <b>Sensitivity</b> | 0.0000        | 0.9942           |
|                            | <b>Specificity</b> | 0.9759        | 1.0000           |
|                            | <b>AUC</b>         | 0.4995        | 0.9985           |
| <b>(b-2)</b>               |                    |               |                  |
| <b>Logistic Regression</b> | <b>Accuracy</b>    | 0.9817        | 0.6822           |
|                            | <b>Sensitivity</b> | 0.0000        | 0.5737           |
|                            | <b>Specificity</b> | 0.9817        | 0.6923           |
|                            | <b>AUC</b>         | 0.5000        | 0.5465           |
| <b>Random Forest</b>       | <b>Accuracy</b>    | 0.9816        | 0.9985           |
|                            | <b>Sensitivity</b> | 0.0000        | 0.9954           |
|                            | <b>Specificity</b> | 0.9817        | 1.0000           |
|                            | <b>AUC</b>         | 0.4999        | 0.9988           |

Abbreviation: AUC, Areas under the operating-characteristic-curve.

<https://doi.org/10.1371/journal.pone.0289486.t003>

0.9984, respectively. We found that PM<sub>10</sub> concentration of each period before delivery was a major contributor to early PTB. We also found that the higher PM<sub>10</sub> concentration of 5 to 7 months before delivery increased the risk of early PTB based on the SHAP value. Furthermore, women with cardiovascular diseases were found to be more vulnerable to PM<sub>10</sub> concentration than those without cardiovascular diseases.

### Effects of PM<sub>10</sub> on PTB

Although the pathophysiology of PM<sub>10</sub> on PTB has not yet been clearly demonstrated, PM<sub>10</sub> induced inflammation and oxidative stress are considered as key pathway of PM<sub>10</sub> causing PTB [39–44]. In addition, because PM concentration has seasonal difference which might have different effects on PTB depending on the period of exposure, some studies have analyzed the effect of PM on PTB according to the trimester of pregnancy [18–22]. Considering these, we analyzed the effect of PM<sub>10</sub> on early PTB according to the concentration of each period before delivery and the specific month which could reflect the season. The current study found that maternal exposure to PM<sub>10</sub> according to the period of pregnancy (PM<sub>10</sub> concentration of

**Table 4. Random forest feature importance of prediction model for early PTB (top 27 variables).** (a) Feature importance in total study population, (b-1) Prediction model for early PTB in women with underlying cardiovascular diseases (original data), (b-2) Prediction model for early PTB in women with underlying cardiovascular diseases (oversampled data).

| (a)                                |                                              |                    |                                              |                    |
|------------------------------------|----------------------------------------------|--------------------|----------------------------------------------|--------------------|
| Original data                      |                                              |                    | Oversampled data                             |                    |
| Rank                               | Variables                                    | Feature importance | Variables                                    | Feature importance |
| 1                                  | Socioeconomic status                         | 0.1392             | Socioeconomic status                         | 0.1017             |
| 2                                  | Age at delivery                              | 0.1273             | Age at delivery                              | 0.0928             |
| 3                                  | Gestational diabetes                         | 0.0367             | PM <sub>10</sub> , 6 months before delivery  | 0.0320             |
| 4                                  | Sepsis                                       | 0.0349             | PM <sub>10</sub> , 2 months before delivery  | 0.0313             |
| 5                                  | Benzodiazepine                               | 0.0348             | PM <sub>10</sub> , 7 months before delivery  | 0.0302             |
| 6                                  | Abnormal menstruation                        | 0.0323             | PM <sub>10</sub> , 1 month before delivery   | 0.0298             |
| 7                                  | Anemia                                       | 0.0295             | PM <sub>10</sub> , 10 months before delivery | 0.0290             |
| 8                                  | Pelvic inflammatory disease                  | 0.0286             | PM <sub>10</sub> , 4 months before delivery  | 0.0283             |
| 9                                  | Vaginitis                                    | 0.0253             | PM <sub>10</sub> , 9 months before delivery  | 0.0280             |
| 10                                 | Hyperlipidemia                               | 0.0209             | PM <sub>10</sub> , 3 months before delivery  | 0.0277             |
| 11                                 | Progesterone                                 | 0.0208             | PM <sub>10</sub> , 5 months before delivery  | 0.0277             |
| 12                                 | PM <sub>10</sub> , 1 month before delivery   | 0.0203             | Gestational diabetes                         | 0.0274             |
| 13                                 | PM <sub>10</sub> , 2 months before delivery  | 0.0202             | PM <sub>10</sub> , 8 months before delivery  | 0.0269             |
| 14                                 | PM <sub>10</sub> , 5 months before delivery  | 0.0199             | Sepsis                                       | 0.0257             |
| 15                                 | PM <sub>10</sub> , 4 months before delivery  | 0.0198             | Benzodiazepine                               | 0.0236             |
| 16                                 | PM <sub>10</sub> , 3 months before delivery  | 0.0197             | Abnormal menstruation                        | 0.0229             |
| 17                                 | PM <sub>10</sub> , 8 months before delivery  | 0.0196             | Anemia                                       | 0.0219             |
| 18                                 | PM <sub>10</sub> , 6 months before delivery  | 0.0195             | Pelvic inflammatory disease                  | 0.0198             |
| 19                                 | PM <sub>10</sub> , 10 months before delivery | 0.0194             | Vaginitis                                    | 0.0197             |
| 20                                 | PM <sub>10</sub> , 7 months before delivery  | 0.0193             | PM <sub>10</sub> , Apr                       | 0.0193             |
| 21                                 | PM <sub>10</sub> , 9 months before delivery  | 0.0191             | PM <sub>10</sub> , Jan                       | 0.0188             |
| 22                                 | Miscarriage or infertility                   | 0.0184             | PM <sub>10</sub> , Mar                       | 0.0188             |
| 23                                 | TA                                           | 0.0178             | PM <sub>10</sub> , May                       | 0.0186             |
| 24                                 | Hypertension                                 | 0.0157             | PM <sub>10</sub> , Jul                       | 0.0185             |
| 25                                 | Tricyclic antidepressant                     | 0.0152             | PM <sub>10</sub> , Aug                       | 0.0185             |
| 26                                 | PM <sub>10</sub> , Feb                       | 0.0129             | PM <sub>10</sub> , Feb                       | 0.0184             |
| 27                                 | PM <sub>10</sub> , Mar                       | 0.0123             | PM <sub>10</sub> , Jun                       | 0.0183             |
| (b-1)                              |                                              |                    |                                              |                    |
| Women with cardiovascular diseases |                                              |                    | Women without cardiovascular diseases        |                    |
| Rank                               | Variables                                    | Feature importance | Variables                                    | Feature importance |
| 1                                  | Socioeconomic status                         | 0.0793             | Socioeconomic status                         | 0.1490             |
| 2                                  | Age at delivery                              | 0.0789             | Age at delivery                              | 0.1347             |
| 3                                  | PM <sub>10</sub> , 1 month before delivery   | 0.0353             | Gestational diabetes                         | 0.0391             |
| 4                                  | PM <sub>10</sub> , 3 months before delivery  | 0.0344             | Sepsis                                       | 0.0357             |
| 5                                  | PM <sub>10</sub> , 2 months before delivery  | 0.0342             | Benzodiazepine                               | 0.0337             |
| 6                                  | PM <sub>10</sub> , 4 months before delivery  | 0.0318             | Abnormal menstruation                        | 0.0330             |
| 7                                  | PM <sub>10</sub> , 6 months before delivery  | 0.0315             | Anemia                                       | 0.0319             |
| 8                                  | PM <sub>10</sub> , 5 months before delivery  | 0.0305             | Pelvic inflammatory disease                  | 0.0296             |
| 9                                  | PM <sub>10</sub> , 7 months before delivery  | 0.0304             | Vaginitis                                    | 0.0263             |
| 10                                 | PM <sub>10</sub> , 10 months before delivery | 0.0297             | Hyperlipidemia                               | 0.0258             |
| 11                                 | PM <sub>10</sub> , 9 months before delivery  | 0.0292             | Progesterone                                 | 0.0235             |
| 12                                 | PM <sub>10</sub> , 8 months before delivery  | 0.0278             | PM <sub>10</sub> , 1 month before delivery   | 0.0201             |
| 13                                 | Anemia                                       | 0.0222             | PM <sub>10</sub> , 2 months before delivery  | 0.0196             |
| 14                                 | Benzodiazepine                               | 0.0220             | PM <sub>10</sub> , 5 months before delivery  | 0.0195             |

(Continued)



Table 4. (Continued)

|                                           |                                              |                           |                                              |                           |
|-------------------------------------------|----------------------------------------------|---------------------------|----------------------------------------------|---------------------------|
| 15                                        | Recurrent miscarriage or infertility         | 0.0216                    | Threatened abortion                          | 0.0193                    |
| 16                                        | PM <sub>10</sub> , Dec                       | 0.0209                    | PM <sub>10</sub> , 7 months before delivery  | 0.0193                    |
| 17                                        | Gestational diabetes                         | 0.0209                    | PM <sub>10</sub> , 8 months before delivery  | 0.0193                    |
| 18                                        | Hyperlipidemia                               | 0.0207                    | PM <sub>10</sub> , 4 months before delivery  | 0.0191                    |
| 19                                        | Pelvic inflammatory disease                  | 0.0202                    | PM <sub>10</sub> , 6 months before delivery  | 0.0191                    |
| 20                                        | PM <sub>10</sub> , Jun                       | 0.0199                    | PM <sub>10</sub> , 3 months before delivery  | 0.0191                    |
| 21                                        | PM <sub>10</sub> , Apr                       | 0.0198                    | PM <sub>10</sub> , 9 months before delivery  | 0.0186                    |
| 22                                        | PM <sub>10</sub> , Sep                       | 0.0198                    | PM <sub>10</sub> , 10 months before delivery | 0.0183                    |
| 23                                        | PM <sub>10</sub> , Aug                       | 0.0197                    | Hypertension                                 | 0.0161                    |
| 24                                        | Sepsis                                       | 0.0193                    | Recurrent miscarriage or infertility         | 0.0159                    |
| 25                                        | PM <sub>10</sub> , Feb                       | 0.0188                    | Tricyclic antidepressant                     | 0.0159                    |
| 26                                        | Abnormal menstruation                        | 0.0188                    | PM <sub>10</sub> , Apr                       | 0.0118                    |
| 27                                        | PM <sub>10</sub> , Jul                       | 0.0185                    | PM <sub>10</sub> , Jan                       | 0.0117                    |
| <b>(b-2)</b>                              |                                              |                           |                                              |                           |
| <b>Women with cardiovascular diseases</b> |                                              |                           | <b>Women without cardiovascular diseases</b> |                           |
| <b>Rank</b>                               | <b>Variables</b>                             | <b>Feature importance</b> | <b>Variables</b>                             | <b>Feature importance</b> |
| 1                                         | Socioeconomic status                         | 0.0581                    | Socioeconomic status                         | 0.1052                    |
| 2                                         | Age at delivery                              | 0.0565                    | Age at delivery                              | 0.0966                    |
| 3                                         | PM <sub>10</sub> , 2 months before delivery  | 0.0462                    | PM <sub>10</sub> , 6 months before delivery  | 0.0327                    |
| 4                                         | PM <sub>10</sub> , 10 months before delivery | 0.0454                    | PM <sub>10</sub> , 2 months before delivery  | 0.0306                    |
| 5                                         | PM <sub>10</sub> , 7 months before delivery  | 0.0398                    | PM <sub>10</sub> , 7 months before delivery  | 0.0303                    |
| 6                                         | PM <sub>10</sub> , 6 months before delivery  | 0.0392                    | PM <sub>10</sub> , 1 month before delivery   | 0.0301                    |
| 7                                         | PM <sub>10</sub> , 4 months before delivery  | 0.0381                    | PM <sub>10</sub> , 10 months before delivery | 0.0294                    |
| 8                                         | PM <sub>10</sub> , 9 months before delivery  | 0.0371                    | PM <sub>10</sub> , 8 months before delivery  | 0.0283                    |
| 9                                         | PM <sub>10</sub> , 3 months before delivery  | 0.0354                    | PM <sub>10</sub> , 9 months before delivery  | 0.0282                    |
| 10                                        | PM <sub>10</sub> , 1 month before delivery   | 0.0349                    | PM <sub>10</sub> , 4 months before delivery  | 0.0282                    |
| 11                                        | PM <sub>10</sub> , 5 months before delivery  | 0.0345                    | PM <sub>10</sub> , 3 months before delivery  | 0.0281                    |
| 12                                        | PM <sub>10</sub> , 8 months before delivery  | 0.0338                    | PM <sub>10</sub> , 5 months before delivery  | 0.0277                    |
| 13                                        | PM <sub>10</sub> , Jan                       | 0.0294                    | Gestational diabetes                         | 0.0272                    |
| 14                                        | PM <sub>10</sub> , Dec                       | 0.0256                    | Sepsis                                       | 0.0262                    |
| 15                                        | PM <sub>10</sub> , Aug                       | 0.0253                    | Benzodiazepine                               | 0.0237                    |
| 16                                        | PM <sub>10</sub> , Jul                       | 0.0250                    | Abnormal menstruation                        | 0.0232                    |
| 17                                        | PM <sub>10</sub> , Sep                       | 0.0248                    | Anemia                                       | 0.0228                    |
| 18                                        | PM <sub>10</sub> , Nov                       | 0.0243                    | Pelvic inflammatory disease                  | 0.0201                    |
| 19                                        | PM <sub>10</sub> , Apr                       | 0.0242                    | Vaginitis                                    | 0.0201                    |
| 20                                        | PM <sub>10</sub> , May                       | 0.0241                    | PM <sub>10</sub> , Jan                       | 0.0196                    |
| 21                                        | PM <sub>10</sub> , Mar                       | 0.0239                    | PM <sub>10</sub> , Apr                       | 0.0195                    |
| 22                                        | PM <sub>10</sub> , Feb                       | 0.0236                    | PM <sub>10</sub> , Feb                       | 0.0188                    |
| 23                                        | PM <sub>10</sub> , Oct                       | 0.0230                    | PM <sub>10</sub> , Mar                       | 0.0187                    |
| 24                                        | PM <sub>10</sub> , Jun                       | 0.0229                    | PM <sub>10</sub> , Dec                       | 0.0186                    |
| 25                                        | Benzodiazepine                               | 0.0155                    | PM <sub>10</sub> , Jul                       | 0.0184                    |
| 26                                        | Sepsis                                       | 0.0142                    | PM <sub>10</sub> , May                       | 0.0183                    |
| 27                                        | Hyperlipidemia                               | 0.0141                    | Hyperlipidemia                               | 0.0182                    |

<https://doi.org/10.1371/journal.pone.0289486.t004>

each month before delivery) was more associated with the risk of early PTB than the concentration of PM<sub>10</sub> itself (monthly PM<sub>10</sub> concentration). In addition, higher PM<sub>10</sub> concentration in 5 to 7 months before delivery (the first and early second trimester) was a major contributor to early PTB and associated with an increased risk of PTB. This result was consistent with

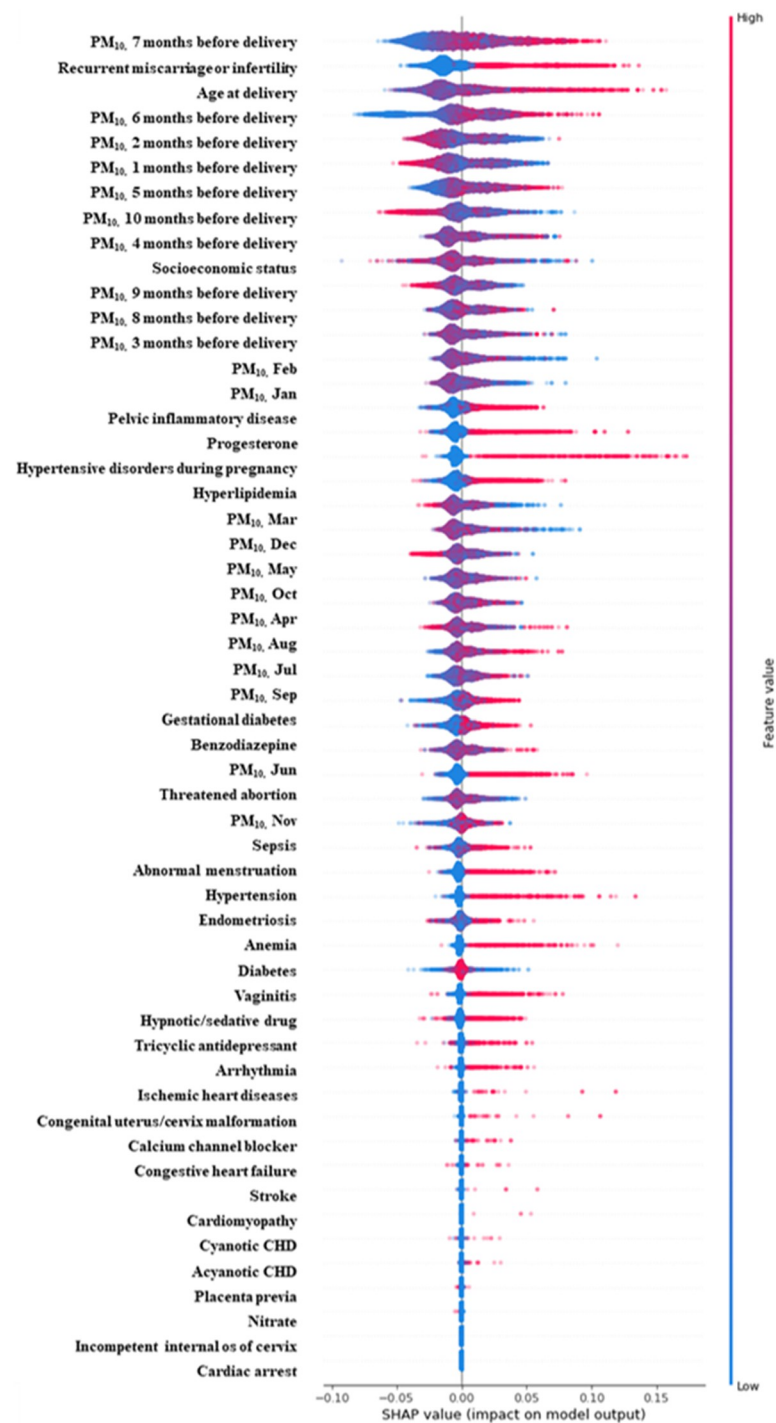

Fig 1. SHAP value of early-PTB prediction model.

<https://doi.org/10.1371/journal.pone.0289486.g001>

previous studies showing that maternal exposure to PM<sub>10</sub> in first and second trimesters could significantly increase the risk of PTB [18–22]. Throughout the current study, we assumed that maternal exposure to PM<sub>10</sub> during the first and early second trimester of pregnancy might have more critical effects on PTB compared to the exposure during other periods.

## Effects of PM<sub>10</sub> on PTB in women with cardiovascular diseases

The pathological mechanism of PM for cardiovascular diseases can be broadly divided into direct translocation and indirect pathway [45]. Direct action has a direct effect on the cardiovascular system as ultrafine particles translocate through the blood stream [45]. The indirect pathway affects cardiovascular diseases by oxidative stress and activation of the inflammation pathway [45]. Several studies have reported that pro-inflammatory cytokines are increased in subjects exposed to PM [46–48]. Systemic inflammatory response can promote atherosclerosis, coagulability, and endothelial dysfunction, which ultimately affects the cardiovascular system [43]. In addition, PM can stimulate the autonomic nervous system and the hypothalamic-pituitary-adrenal (HPA) axis. It is also associated with systemic inflammatory responses and atherosclerosis [49–54]. Women with cardiovascular diseases have suboptimal cardiac adaptation during pregnancy compared to healthy women. They also have more underlying cardiovascular risk factors that can increase the risk of PTB, which will increase the likelihood of PTB [31, 55–59]. In this study, we found that PM<sub>10</sub> had a relatively stronger effect on early PTB of pregnant women with cardiovascular diseases than those without cardiovascular diseases. We assumed that PM<sub>10</sub> exacerbate the cardiovascular function of pregnant women with underlying cardiovascular diseases, and this can further increase the risk of early PTB.

## Strength and limitation

The strength of the current study was that we used large-scale population-based data and analyzed these data with machine learning, one of the optimal methods for analyzing large amounts of data. Moreover, we used various variables including demographic/socioeconomic, obstetric, and gynecologic, cardiovascular, and other medical information as confounding factors. Furthermore, we analyzed the timing and co-morbidities that might exaggerate the effect of PM<sub>10</sub> on early PTB. However, this study also has some limitations. First, we could not present the actual gestational age at delivery because we used original data from KNHIS claims that only provided ICD-10 code, not the actual gestational age at delivery. In addition, we could not subdivide the cause of early PTB. There are various mechanisms of early PTB including spontaneous preterm labor, severe maternal morbidity such as preeclampsia, and severe fetal morbidity such as non-reassuring fetal heart rate. However, we could not analyze the mechanism of PTB due to the lack of information in the original data. Lastly, other air pollutants such as PM<sub>2.5</sub>, NO<sub>2</sub>, and O<sub>3</sub> were not evaluated.

## Conclusion

With this large population-based cohort study using machine learning, we found that maternal exposure to PM<sub>10</sub> was a major contributor to early PTB. Moreover, we found that in the context of PTB, pregnant women with cardiovascular diseases are a high-risk group of PM<sub>10</sub> and the first and early second trimester is a high-risk period of PM<sub>10</sub>. The current study emphasized the importance of PM<sub>10</sub> as an overlooked risk factor for PTB. We believe that these findings can alert the risk of PM<sub>10</sub> to both obstetricians and pregnant women, and the effort to reduce the maternal exposure to PM<sub>10</sub>, especially in pregnant women with cardiovascular diseases in their first and early second trimester is needed.

## Supporting information

**S1 Table. ICD-10 Codes and procedure codes for preterm birth and cardiovascular diseases.**

(DOC)

**S2 Table. ATC codes for medications.**  
(DOC)

## Author Contributions

**Conceptualization:** Eun-Saem Choi, Jue Seong Lee, Ki Hoon Ahn.

**Data curation:** Yujin Hwang, Kwang-Sig Lee.

**Formal analysis:** Yujin Hwang, Kwang-Sig Lee.

**Methodology:** Yujin Hwang, Kwang-Sig Lee.

**Software:** Yujin Hwang, Kwang-Sig Lee.

**Supervision:** Ki Hoon Ahn.

**Writing – original draft:** Eun-Saem Choi, Jue Seong Lee.

**Writing – review & editing:** Eun-Saem Choi, Jue Seong Lee, Kwang-Sig Lee, Ki Hoon Ahn.

## References

- Hoffman MK. Prediction and Prevention of Spontaneous Preterm Birth: ACOG Practice Bulletin, Number 234. *Obstet Gynecol.* 2021; 138: 945–946. <https://doi.org/10.1097/AOG.0000000000004612> PMID: [34794160](https://pubmed.ncbi.nlm.nih.gov/34794160/)
- Blencowe H, Cousens S, Oestergaard MZ, Chou D, Moller AB, Narwal R, et al. National, regional, and worldwide estimates of preterm birth rates in the year 2010 with time trends since 1990 for selected countries: a systematic analysis and implications. *Lancet.* 2012; 379: 2162–2172. [https://doi.org/10.1016/S0140-6736\(12\)60820-4](https://doi.org/10.1016/S0140-6736(12)60820-4) PMID: [22682464](https://pubmed.ncbi.nlm.nih.gov/22682464/)
- Martin JA, Osterman M. Exploring the Decline in the Singleton Preterm Birth Rate in the United States, 2019–2020. *NCHS Data Brief.* 2021; 1–8 PMID: [35072604](https://pubmed.ncbi.nlm.nih.gov/35072604/)
- Walani SR. Global burden of preterm birth. *Int J Gynaecol Obstet.* 2020; 150: 31–33. <https://doi.org/10.1002/ijgo.13195> PMID: [32524596](https://pubmed.ncbi.nlm.nih.gov/32524596/)
- Martin JA, Hamilton BE, Osterman MJK, Driscoll AK. Births: Final Data for 2019. *Natl Vital Stat Rep.* 2021; 70: 1–51 PMID: [33814033](https://pubmed.ncbi.nlm.nih.gov/33814033/)
- Ely DM, Driscoll AK. Infant Mortality in the United States, 2018: Data From the Period Linked Birth/Infant Death File. *Natl Vital Stat Rep.* 2020; 69: 1–18 PMID: [32730740](https://pubmed.ncbi.nlm.nih.gov/32730740/)
- Wen SW, Smith G, Yang Q, Walker M. Epidemiology of preterm birth and neonatal outcome. *Semin Fetal Neonatal Med.* 2004; 9: 429–435. <https://doi.org/10.1016/j.siny.2004.04.002> PMID: [15691780](https://pubmed.ncbi.nlm.nih.gov/15691780/)
- Andrews WW, Cliver SP, Biasini F, Peralta-Carcelen AM, Rector R, Alriksson-Schmidt AI, et al. Early preterm birth: association between in utero exposure to acute inflammation and severe neurodevelopmental disability at 6 years of age. *Am J Obstet Gynecol.* 2008; 198: 466 e461–466 e411. <https://doi.org/10.1016/j.ajog.2007.12.031> PMID: [18395043](https://pubmed.ncbi.nlm.nih.gov/18395043/)
- Gleissner M, Jorch G, Avenarius S. Risk factors for intraventricular hemorrhage in a birth cohort of 3721 premature infants. *J Perinat Med.* 2000; 28: 104–110. <https://doi.org/10.1515/JPM.2000.013> PMID: [10875094](https://pubmed.ncbi.nlm.nih.gov/10875094/)
- Robertson PA, Sniderman SH, Laros RK Jr., Cowan R, Heilbron D, Goldenberg RL, et al. Neonatal morbidity according to gestational age and birth weight from five tertiary care centers in the United States, 1983 through 1986. *Am J Obstet Gynecol.* 1992; 166: 1629–1641; discussion 1641–1625. [https://doi.org/10.1016/0002-9378\(92\)91551-k](https://doi.org/10.1016/0002-9378(92)91551-k) PMID: [1615970](https://pubmed.ncbi.nlm.nih.gov/1615970/)
- Crider KS, Whitehead N, Buus RM. Genetic variation associated with preterm birth: a HuGE review. *Genet Med.* 2005; 7: 593–604. <https://doi.org/10.1097/01.gim.0000187223.69947.db> PMID: [16301860](https://pubmed.ncbi.nlm.nih.gov/16301860/)
- Kwag Y, Kim MH, Oh J, Shah S, Ye S, Ha EH. Effect of heat waves and fine particulate matter on preterm births in Korea from 2010 to 2016. *Environ Int.* 2021; 147: 106239. <https://doi.org/10.1016/j.envint.2020.106239> PMID: [33341584](https://pubmed.ncbi.nlm.nih.gov/33341584/)
- Zhang Y, Mustieles V, Yland J, Braun JM, Williams PL, Attaman JA, et al. Association of Parental Preconception Exposure to Phthalates and Phthalate Substitutes With Preterm Birth. *JAMA Netw Open.* 2020; 3: e202159. <https://doi.org/10.1001/jamanetworkopen.2020.2159> PMID: [32259265](https://pubmed.ncbi.nlm.nih.gov/32259265/)

14. Wang YY, Li Q, Guo Y, Zhou H, Wang X, Wang Q, et al. Association of Long-term Exposure to Airborne Particulate Matter of 1  $\mu\text{m}$  or Less With Preterm Birth in China. *JAMA Pediatr.* 2018; 172: e174872. <https://doi.org/10.1001/jamapediatrics.2017.4872> PMID: 29297052
15. Huynh M, Woodruff TJ, Parker JD, Schoendorf KC. Relationships between air pollution and preterm birth in California. *Paediatr Perinat Epidemiol.* 2006; 20: 454–461. <https://doi.org/10.1111/j.1365-3016.2006.00759.x> PMID: 17052280
16. Pereira G, Bell ML, Lee HJ, Koutrakis P, Belanger K. Sources of fine particulate matter and risk of preterm birth in Connecticut, 2000–2006: a longitudinal study. *Environ Health Perspect.* 2014; 122: 1117–1122. <https://doi.org/10.1289/ehp.1307741> PMID: 24911470
17. Mekonnen ZK, Oehlert JW, Eskenazi B, Shaw GM, Balmes JR, Padula AM. The relationship between air pollutants and maternal socioeconomic factors on preterm birth in California urban counties. *J Expo Sci Environ Epidemiol.* 2021; 31: 503–513. <https://doi.org/10.1038/s41370-021-00323-7> PMID: 33859340
18. Hansen C, Neller A, Williams G, Simpson R. Maternal exposure to low levels of ambient air pollution and preterm birth in Brisbane, Australia. *BJOG.* 2006; 113: 935–941. <https://doi.org/10.1111/j.1471-0528.2006.01010.x> PMID: 16907939
19. Bobak M. Outdoor air pollution, low birth weight, and prematurity. *Environ Health Perspect.* 2000; 108: 173–176. <https://doi.org/10.1289/ehp.00108173> PMID: 10656859
20. Ritz B, Yu F, Chapa G, Fruin S. Effect of air pollution on preterm birth among children born in Southern California between 1989 and 1993. *Epidemiology.* 2000; 11: 502–511. <https://doi.org/10.1097/00001648-200009000-00004> PMID: 10955401
21. Leem JH, Kaplan BM, Shim YK, Pohl HR, Gotway CA, Bullard SM, et al. Exposures to air pollutants during pregnancy and preterm delivery. *Environ Health Perspect.* 2006; 114: 905–910. <https://doi.org/10.1289/ehp.8733> PMID: 16759993
22. Sheridan P, Ilango S, Bruckner TA, Wang Q, Basu R, Benmarhnia T. Ambient Fine Particulate Matter and Preterm Birth in California: Identification of Critical Exposure Windows. *Am J Epidemiol.* 2019; 188: 1608–1615. <https://doi.org/10.1093/aje/kwz120> PMID: 31107509
23. Ju L, Li C, Yang M, Sun S, Zhang Q, Cao J, et al. Maternal air pollution exposure increases the risk of preterm birth: Evidence from the meta-analysis of cohort studies. *Environ Res.* 2021; 202:111654. <https://doi.org/10.1016/j.envres.2021.111654> PMID: 34252430
24. Yu Z, Zhang X, Zhang J, Feng Y, Zhang H, Wan Z, et al. Gestational exposure to ambient particulate matter and preterm birth: An updated systematic review and meta-analysis. *Environ Res.* 2022; 212(Pt C):113381. <https://doi.org/10.1016/j.envres.2022.113381> PMID: 35523275
25. Li X, Huang S, Jiao A, Yang X, Yun J, Wang Y, et al. Association between ambient fine particulate matter and preterm birth or term low birth weight: An updated systematic review and meta-analysis. *Environ Pollut.* 2017; 227:596–605. <https://doi.org/10.1016/j.envpol.2017.03.055> PMID: 28457735
26. Lamichhane DK, Leem JH, Lee JY, Kim HC. A meta-analysis of exposure to particulate matter and adverse birth outcomes. *Environ Health Toxicol.* 2015; 30:e2015011. <https://doi.org/10.5620/eht.e2015011> PMID: 26796890
27. Peters A, Dockery DW, Muller JE, Mittleman MA. Increased particulate air pollution and the triggering of myocardial infarction. *Circulation.* 2001; 103: 2810–2815. <https://doi.org/10.1161/01.cir.103.23.2810> PMID: 11401937
28. Brook RD, Brook JR, Rajagopalan S. Air pollution: the "Heart" of the problem. *Curr Hypertens Rep.* 2003; 5: 32–39. <https://doi.org/10.1007/s11906-003-0008-y> PMID: 12530933
29. Brook RD. Cardiovascular effects of air pollution. *Clin Sci (Lond).* 2008; 115: 175–187. <https://doi.org/10.1042/CS20070444> PMID: 18691154
30. World Health O. WHO global air quality guidelines:: particulate matter (PM<sub>2.5</sub> and PM<sub>10</sub>), ozone, nitrogen dioxide, sulfur dioxide and carbon monoxide.
31. Bright RA, Lima FV, Avila C, Butler J, Stergiopoulos K. Maternal Heart Failure. *J Am Heart Assoc.* 2021; 10(14):e021019. <https://doi.org/10.1161/JAHA.121.021019> PMID: 34259013
32. Sibai BM, Caritis SN, Hauth JC, MacPherson C, VanDorsten JP, Klebanoff M, et al. Preterm delivery in women with pregestational diabetes mellitus or chronic hypertension relative to women with uncomplicated pregnancies. The National Institute of Child Health and Human Development Maternal- Fetal Medicine Units Network. *Am J Obstet Gynecol.* 2000; 183: 1520–1524. <https://doi.org/10.1067/mob.2000.107621> PMID: 11120521
33. Ramlakhan KP, Johnson MR, Roos-Hesselink JW. Pregnancy and cardiovascular disease. *Nat Rev Cardiol.* 2020; 17: 718–731. <https://doi.org/10.1038/s41569-020-0390-z> PMID: 32518358
34. Lee JS, Choi ES, Hwang Y, Lee KS, Ahn KH. Preterm birth and maternal heart disease: A machine learning analysis using the Korean national health insurance database. *PLoS One.* 2023; 18: e0283959. <https://doi.org/10.1371/journal.pone.0283959> PMID: 37000887

35. Kim JA, Yoon S, Kim LY, Kim DS. Towards Actualizing the Value Potential of Korea Health Insurance Review and Assessment (HIRA) Data as a Resource for Health Research: Strengths, Limitations, Applications, and Strategies for Optimal Use of HIRA Data. *J Korean Med Sci*. 2017; 32: 718–728. <https://doi.org/10.3346/jkms.2017.32.5.718> PMID: 28378543
36. Lee KS, Kim ES, Song IS, Kim HI, Ahn KH. Association of Preterm Birth with Inflammatory Bowel Disease and Salivary Gland Disease: Machine Learning Analysis Using National Health Insurance Data. *Int J Environ Res Public Health*. 2022; 19. <https://doi.org/10.3390/ijerph19053056> PMID: 35270746
37. Lee KS, Song IS, Kim ES, Kim HI, Ahn KH. Association of preterm birth with medications: machine learning analysis using national health insurance data. *Arch Gynecol Obstet*. 2022; 305: 1369–1376. <https://doi.org/10.1007/s00404-022-06405-7> PMID: 35038042
38. Lee KS, Kim ES, Kim DY, Song IS, Ahn KH. Association of Gastroesophageal Reflux Disease with Preterm Birth: Machine Learning Analysis. *J Korean Med Sci*. 2021; 36: e282. <https://doi.org/10.3346/jkms.2021.36.e282> PMID: 34751010
39. Lee KS, Kim HI, Kim HY, Cho GJ, Hong SC, Oh MJ, et al. Association of Preterm Birth with Depression and Particulate Matter: Machine Learning Analysis Using National Health Insurance Data. *Diagnostics (Basel)*. 2021; 11. <https://doi.org/10.3390/diagnostics11030555> PMID: 33808913
40. Lee KS, Ahn KH. Artificial Neural Network Analysis of Spontaneous Preterm Labor and Birth and Its Major Determinants. *J Korean Med Sci*. 2019; 34: e128. <https://doi.org/10.3346/jkms.2019.34.e128> PMID: 31020816
41. Lee KS, Ahn KH. Application of Artificial Intelligence in Early Diagnosis of Spontaneous Preterm Labor and Birth. *Diagnostics (Basel)*. 2020; 10. <https://doi.org/10.3390/diagnostics10090733> PMID: 32971981
42. Lee KS, Song IS, Kim ES, Ahn KH. Determinants of Spontaneous Preterm Labor and Birth Including Gastroesophageal Reflux Disease and Periodontitis. *J Korean Med Sci*. 2020; 35: e105. <https://doi.org/10.3346/jkms.2020.35.e105> PMID: 32281316
43. Wang J, Tang B, Liu X, Wu X, Wang H, Xu D, et al. Increased monomeric CRP levels in acute myocardial infarction: a possible new and specific biomarker for diagnosis and severity assessment of disease. *Atherosclerosis*. 2015; 239: 343–349. <https://doi.org/10.1016/j.atherosclerosis.2015.01.024> PMID: 25682033
44. van Eeden SF, Tan WC, Suwa T, Mukae H, Terashima T, Fujii T, et al. Cytokines involved in the systemic inflammatory response induced by exposure to particulate matter air pollutants (PM(10)). *Am J Respir Crit Care Med*. 2001; 164: 826–830. <https://doi.org/10.1164/ajrccm.164.5.2010160> PMID: 11549540
45. Du Y, Xu X, Chu M, Guo Y, Wang J. Air particulate matter and cardiovascular disease: the epidemiological, biomedical and clinical evidence. *J Thorac Dis*. 2016; 8: E8–E19. <https://doi.org/10.3978/j.issn.2072-1439.2015.11.37> PMID: 26904258
46. Gurgueira SA, Lawrence J, Coull B, Murthy GG, Gonzalez-Flecha B. Rapid increases in the steady-state concentration of reactive oxygen species in the lungs and heart after particulate air pollution inhalation. *Environ Health Perspect*. 2002; 110: 749–755. <https://doi.org/10.1289/ehp.02110749> PMID: 12153754
47. Meier R, Cascio WE, Ghio AJ, Wild P, Danuser B, Riediker M. Associations of short-term particle and noise exposures with markers of cardiovascular and respiratory health among highway maintenance workers. *Environ Health Perspect*. 2014; 122: 726–732. <https://doi.org/10.1289/ehp.1307100> PMID: 24647077
48. Steinvil A, Kordova-Biezuner L, Shapira I, Berliner S, Rogowski O. Short-term exposure to air pollution and inflammation-sensitive biomarkers. *Environ Res*. 2008; 106: 51–61. <https://doi.org/10.1016/j.envres.2007.08.006> PMID: 17915210
49. Rajagopalan S, Al-Kindi SG, Brook RD. Air Pollution and Cardiovascular Disease: JACC State-of-the-Art Review. *J Am Coll Cardiol*. 2018; 72: 2054–2070. <https://doi.org/10.1016/j.jacc.2018.07.099> PMID: 30336830
50. Wilker EH, Alexeeff SE, Suh H, Vokonas PS, Baccarelli A, Schwartz J. Ambient pollutants, polymorphisms associated with microRNA processing and adhesion molecules: the Normative Aging Study. *Environ Health*. 2011; 10: 45. <https://doi.org/10.1186/1476-069X-10-45> PMID: 21600003
51. Fossati S, Baccarelli A, Zanobetti A, Hoxha M, Vokonas PS, Wright RO, et al. Ambient particulate air pollution and microRNAs in elderly men. *Epidemiology*. 2014; 25: 68–78. <https://doi.org/10.1097/EDE.000000000000026> PMID: 24257509
52. Bollati V, Iodice S, Favero C, Angelici L, Albetti B, Cacace R, et al. Susceptibility to particle health effects, miRNA and exosomes: rationale and study protocol of the SPHERE study. *BMC Public Health*. 2014; 14: 1137. <https://doi.org/10.1186/1471-2458-14-1137> PMID: 25371091
53. Martinelli N, Olivieri O, Girelli D. Air particulate matter and cardiovascular disease: a narrative review. *Eur J Intern Med*. 2013; 24: 295–302. <https://doi.org/10.1016/j.ejim.2013.04.001> PMID: 23647842



54. Magari SR, Schwartz J, Williams PL, Hauser R, Smith TJ, Christiani DC. The association between personal measurements of environmental exposure to particulates and heart rate variability. *Epidemiology*. 2002; 13: 305–310. <https://doi.org/10.1097/00001648-200205000-00011> PMID: 11964932
55. Rohlfing AB, Nah G, Ryckman KK, Snyder BD, Kasarek D, Paynter RA, et al. Maternal cardiovascular disease risk factors as predictors of preterm birth in California: a case-control study. *BMJ Open*. 2020; 10: e034145. <https://doi.org/10.1136/bmjopen-2019-034145> PMID: 32499261
56. Wang MC, Freaney PM, Perak AM, Allen NB, Greenland P, Grobman WA, et al. Association of pre-pregnancy cardiovascular risk factor burden with adverse maternal and offspring outcomes. *Eur J Prev Cardiol*. 2022; 29: e156–e158. <https://doi.org/10.1093/eurjpc/zwab121> PMID: 34284496
57. Regitz-Zagrosek V, Roos-Hesselink JW, Bauersachs J, Blomstrom-Lundqvist C, Cifkova R, De Bonis M, et al. 2018 ESC Guidelines for the management of cardiovascular diseases during pregnancy. *Kardiol Pol*. 2019; 77: 245–326. <https://doi.org/10.5603/KP.2019.0049> PMID: 30912108
58. Pieper PG, Balci A, Aarnoudse JG, Kampman MA, Sollie KM, Groen H, et al. Uteroplacental blood flow, cardiac function, and pregnancy outcome in women with congenital heart disease. *Circulation*. 2013; 128: 2478–2487. <https://doi.org/10.1161/CIRCULATIONAHA.113.002810> PMID: 24192800
59. Wald RM, Silversides CK, Kingdom J, Toi A, Lau CS, Mason J, et al. Maternal Cardiac Output and Fetal Doppler Predict Adverse Neonatal Outcomes in Pregnant Women With Heart Disease. *J Am Heart Assoc*. 2015; 4. <https://doi.org/10.1161/JAHA.115.002414> PMID: 26597153
